# Supplementary material for: Identification of Benzophenone Analogs in Rice Cereal through Fast Pesticide Extraction and Ultrahigh-Performance Liquid Chromatography–Tandem Mass Spectrometry
Source: MDPI journal article supplement (doi:10.3390/foods11040572), 2022-02-16
Supplement: s1 [file s1]

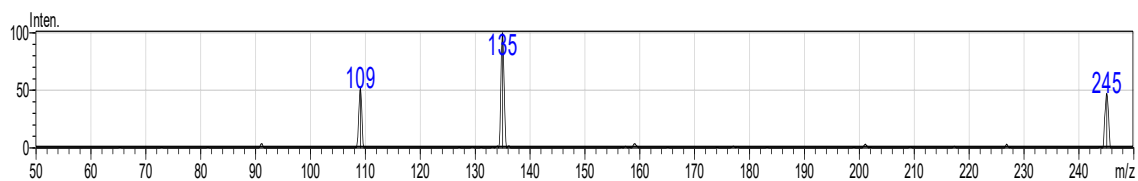

BP-2. Precursor ion: 245 (m/z); Collision energy: -15V

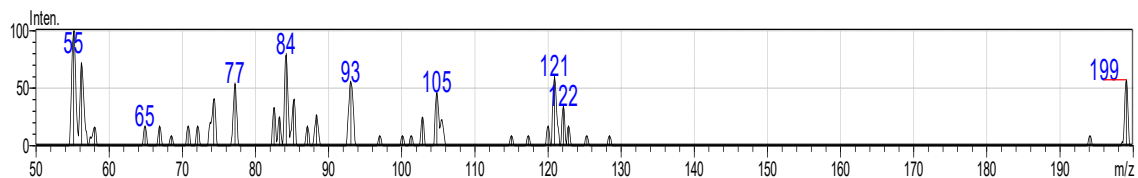

4-OHBP. Precursor ion: 199 (m/z); Collision energy: 25V

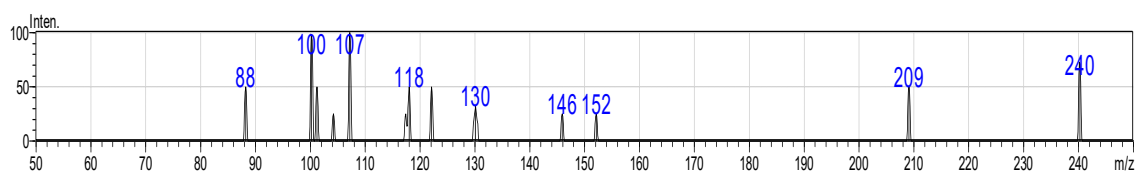

M2BB. Precursor ion: 240.25 (m/z); Collision energy: 20V

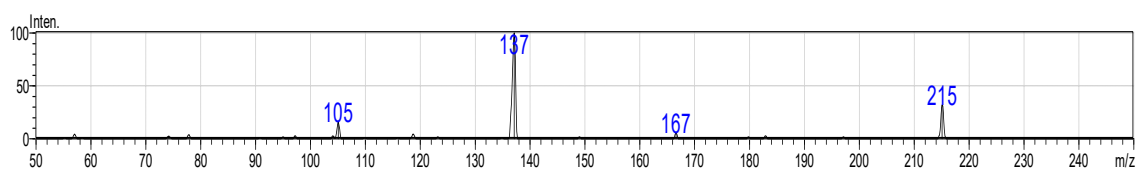

BP-1. Precursor ion: 215 (m/z); Collision energy: 20V

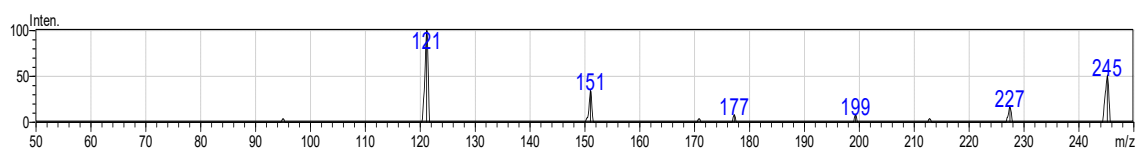

BP-8. Precursor ion: 245 (m/z); Collision energy: 15V

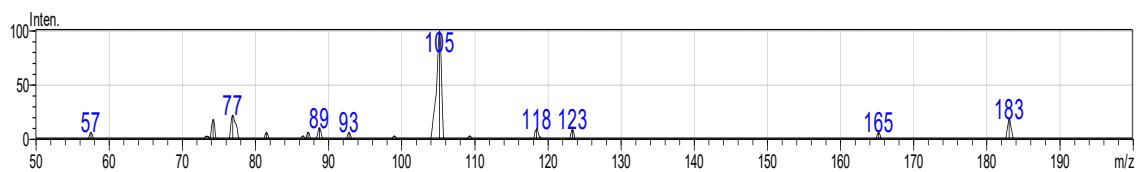

BP. Precursor ion: 183 (m/z); Collision energy: 20V

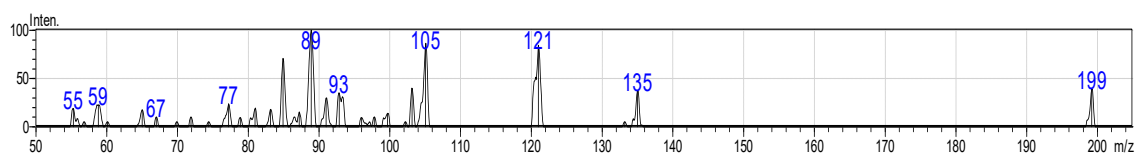

2-OHBP. Precursor ion: 199.2 (m/z); Collision energy: 25V

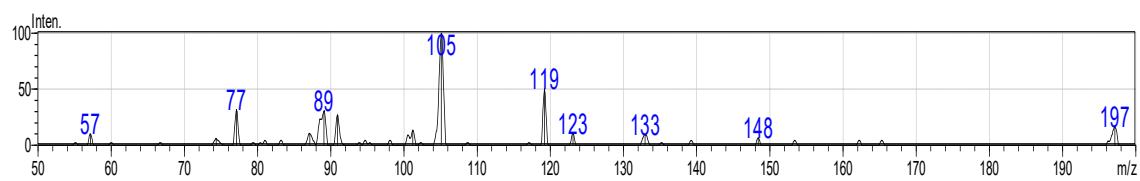

4-MBP. Precursor ion: 197 (m/z); Collision energy: 20V

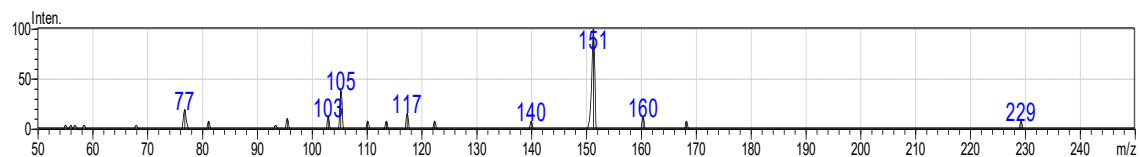

BP-3. Precursor ion: 229 (m/z); Collision energy: 25V

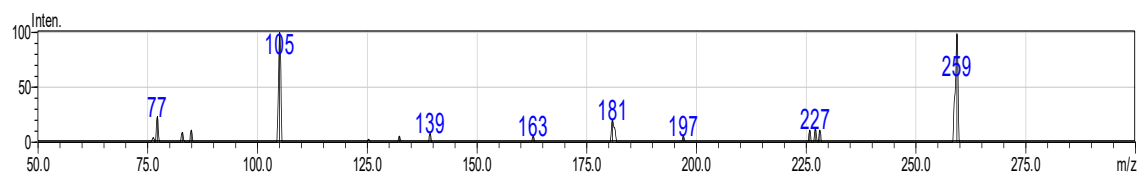

PBZ. Precursor ion: 259 (m/z); Collision energy: 15V

**Figure S1.** The respective mass spectra of the BP and nine BP analogs.
